# Supplementary material for: Wnt-11 Expression Promotes Invasiveness and Correlates with Survival in Human Pancreatic Ductal Adeno Carcinoma
Source: Genes (Basel). 2019 Nov 11;10(11):921. doi: 10.3390/genes10110921 (PMC6895970; doi:10.3390/genes10110921)
Supplement: Supplementary file 1 [file genes-10-00921-s001.xlsx]

## Sheet: RNAseq panc data for pinar_NOV1
Gene	Panc1 C1	Panc1 C2	MiaPaCa C1	MiaPaCa C2
SEC24B-AS1	0	0.403	0	0
A1BG	0.221	0	0.206	0
A1CF	0	0	0	0
GGACT	0	0	0	0
A2M	0	0	0	0
A2ML1	0	0	0	0
A2MP1	0	0	0	0
A4GALT	5.073	5.642	1.648	0
A4GNT	0	0	0.206	0
AAAS	56.249	38.287	37.295	27.581
AACS	84.043	85.844	61.815	54.841
AADAC	0	0	0	0
AADACL2	0	0	0	0
AADACL3	0	0	0	0
AADACL4	0	0	0	0
AADAT	0.662	2.821	2.267	4.169
AAGAB	106.101	128.565	83.245	91.723
AAK1	0.662	1.209	3.503	5.131
AAMP	113.601	91.889	54.191	50.672
AANAT	0	0.403	0	0
AARS	420.213	185.794	160.308	206.216
AARS2	9.706	4.433	7.006	6.414
PTGES3L-AARSD1	1.324	0	0.412	0
AASDH	1.103	0.403	1.03	5.452
AASDHPPT	3.971	12.091	11.745	24.695
AASS	0	0	0.412	0.962
AATF	125.733	205.139	350.905	418.526
AATK	1.324	0	1.236	0.321
ABAT	1.324	1.209	11.127	16.035
ABCA1	7.059	12.091	16.484	19.563
ABCA10	0.221	0	0	0.321
ABCA12	0	0	0	0
ABCA13	0.662	0.806	0	0
ABCA17P	0	0	0	0
ABCA2	59.117	62.066	52.749	81.46
ABCA3	85.587	96.323	27.817	40.089
ABCA4	0	0	0.206	0
ABCA5	5.073	15.718	4.121	13.149
ABCA6	0	0	0	0.641
ABCA7	3.529	3.627	3.709	1.283
ABCA8	0	0	0.206	0
ABCA9	0	0	0	0
ABCB1	0.221	0.403	0	0
ABCB10	39.043	31.436	69.439	68.311
ABCB11	0	0	0	0
ABCB4	0	0	0	0
ABCB5	0	0	0	0
ABCB6	56.028	16.927	10.715	14.111
ABCB7	22.279	32.242	28.847	36.24
ABCB8	23.161	20.554	10.921	6.414
ABCB9	3.088	0.806	1.236	0.641
ABCC1	164.115	75.768	12.981	15.394
ABCC10	38.823	25.39	7.212	4.811
ABCC11	0.441	0	0.206	0
ABCC12	0	0	0	0
ABCC2	2.426	1.612	28.229	28.864
ABCC3	116.027	92.695	11.539	7.697
ABCC4	13.014	56.02	14.63	19.243
ABCC5	11.25	12.091	14.424	26.94
ABCC6	0	0	0	0
ABCC8	0	0	0	0.321
ABCC9	0	0	0	0
ABCD1	97.057	66.096	8.036	21.488
ABCD2	0	0	0	0
ABCD3	75.219	63.678	65.112	68.311
ABCD4	10.367	4.03	7.624	9.621
ABCE1	161.468	156.776	174.525	301.788
ABCF1	278.818	160.806	124.455	89.799
ABCF2	144.262	159.597	188.33	136.943
ABCF3	16.323	29.421	12.569	11.546
ABCG1	0	0	0	0.321
ABCG2	100.807	122.116	1.03	2.245
ABCG4	0	0	1.03	0.321
ABCG5	0.221	0	0	0
ABCG8	0	0	0	0
ABHD1	0.221	0.403	0	0.321
ABHD10	15.441	8.06	22.253	19.563
ABHD11	36.176	23.375	107.971	97.816
ABHD12	14.338	54.408	16.69	19.563
ABHD12B	0	0	0	0
ABHD13	13.235	7.657	1.442	0
ABHD14A	6.176	4.433	3.091	4.49
ABHD14B	116.91	96.323	64.288	105.834
ABHD15	29.558	45.542	15.454	16.356
ABHD16A	45.882	64.484	35.029	31.109
ABHD16B	3.529	0.806	1.442	2.566
ABHD2	74.557	51.184	19.163	35.278
ABHD3	20.294	28.615	29.053	41.051
ABHD4	3.088	0.403	7.83	13.791
ABHD5	1.985	1.209	4.533	13.791
ABHD6	29.117	18.136	15.042	17.639
ABHD8	15	14.106	5.151	3.528
ABI1	123.086	110.832	113.74	114.173
ABI2	12.794	11.285	18.132	16.035
ABI3	0	0	0	0
ABI3BP	0	0.403	0	0
ABL1	43.896	40.705	53.779	48.106
ABL2	52.499	64.081	41.416	67.349
ABLIM1	275.289	284.938	1.442	2.245
ABLIM2	0	0.403	0	0.641
ABLIM3	12.353	7.657	0	0.321
ABO	0	0	0	0
ABP1	0	0	0	0
ABR	4.632	3.224	1.442	0
ABRA	0	0	0	0
ABT1	59.558	46.348	41.828	44.899
ABTB1	20.956	19.748	42.653	47.465
ABTB2	105.219	70.529	10.921	11.546
ACAA1	17.647	9.673	3.915	5.131
ACAA2	67.719	85.038	113.946	99.099
ACACA	22.5	35.466	40.386	30.788
ACACB	9.706	4.836	11.745	7.376
ACAD10	7.059	5.642	10.715	7.697
ACAD8	18.088	27.406	14.011	13.149
ACAD9	183.747	99.547	93.547	112.569
ACADL	0	0	0	0
ACADM	1.985	12.897	15.042	17.318
ACADS	12.573	4.433	5.357	4.49
ACADSB	10.147	10.479	14.63	12.187
ACADVL	71.69	40.705	78.505	103.91
ACAN	0	0	0	0
ACAP1	1.985	1.612	1.03	1.604
ACAP2	68.602	61.663	50.688	37.202
ACAP3	5.073	2.821	6.8	4.49
ACAT1	14.559	42.317	32.35	31.75
ACAT2	82.719	159.194	20.399	21.808
ACBD3	96.836	66.902	109.001	64.142
ACBD4	5.956	5.239	2.061	2.566
ACBD5	19.632	12.897	28.847	12.508
ACBD6	4.632	6.448	11.127	25.977
ACBD7	1.765	1.209	17.102	16.677
ASIC2	0	0	0	0
ASIC1	4.191	9.27	6.8	4.811
ASIC3	0.441	0	1.442	1.283
ASIC5	0	0	0	0
ACCS	3.088	13.3	0.824	0.962
ACCSL	0	0	0	0
ACD	5.956	6.448	9.272	15.073
ACE	19.632	5.239	17.102	10.904
ACE2	0	0.403	0	0
ACER1	0	0	0.206	0.641
ACER2	2.206	4.03	7.212	5.131
ACER3	1.103	1.209	0.824	4.169
ACHE	0.221	0.403	0	0
ACIN1	47.646	51.99	32.968	28.864
ACLY	184.408	197.885	254.885	235.401
ACMSD	0	0	0	0
ACN9	26.47	24.987	38.738	44.899
ACO1	19.853	36.675	10.715	17.318
ACO2	97.939	51.587	66.142	63.18
ACOT11	1.324	4.03	2.061	2.566
ACOT12	0.662	0.806	0	0
ACOT13	50.293	41.108	44.919	45.22
ACOT2	8.382	17.33	17.308	13.791
ACOT4	2.206	5.239	0	0
ACOT6	0	0	0	0
ACOT7	128.601	128.162	84.275	95.892
ACOT8	14.338	8.463	7.624	9.621
ACOT9	37.499	25.39	39.768	53.238
ACOX1	49.411	93.098	58.312	80.819
ACOX2	0	0.403	0.206	0.321
ACOX3	3.971	2.015	2.679	1.604
ACOXL	3.309	4.03	0	0
ACP1	169.409	136.625	138.466	170.297
ACP2	19.853	20.151	8.242	5.452
ACP5	0.441	0.403	0	0
ACP6	28.014	20.957	13.599	22.77
ACPL2	1.544	5.239	37.295	44.899
ACPP	0	0	0.206	0
ACPT	0	0	0	0
ACR	1.103	0	0.206	0
ACRBP	0.662	0.403	0.412	0.321
ACRC	2.868	3.224	1.03	1.604
ACRV1	0.221	0.403	0.206	0
ACSBG1	0	0	0	0
ACSBG2	0	0	0	0
ACSF2	25.588	24.584	36.883	31.109
ACSF3	14.338	8.867	25.344	30.788
ACSL1	11.029	8.867	29.259	18.28
ACSL3	11.47	20.151	16.278	37.523
ACSL4	132.351	180.152	89.426	87.554
ACSL5	5.294	6.851	2.473	2.566
ACSL6	0.221	0.806	0	0
ACSM1	0	0	0	0
ACSM2A	0	0	0	0
ACSM2B	0	0	0	0
ACSM3	0	0	0.618	0.641
ACSM4	0	0	0	0
ACSM5	0	0	0	0
ACSS2	0.221	0	0	0
ACSS3	0	0	0	0
ACTA1	0	0	0.412	0
ACTA2	3.529	7.657	4.121	6.414
ACTB	5102.99	4846.36	11311	13998.3
ACTBL2	0	0	0.206	0
ACTC1	0	0	0	0
ACTG1	6906.71	6283.54	7665.09	10910.5
ACTG2	0.221	0	0.412	0
ACTL10	5.956	6.851	8.036	9.621
ACTL6A	29.338	21.36	31.32	18.28
ACTL6B	0.221	0	0	0
ACTL7A	0	0	1.03	0.321
ACTL7B	0	0	0	0
ACTL8	0	0	0	0
ACTL9	0	0	0.412	0
ACTN1	144.483	94.308	120.952	182.163
ACTN2	0.441	0.806	0.206	0
ACTN3	0	0	0	0
ACTN4	4717.85	3335.42	414.78	451.88
ACTR10	16.323	33.451	38.119	46.824
ACTR1A	67.719	72.141	45.949	33.675
ACTR1B	41.69	50.781	45.537	35.599
ACTR2	444.257	601.311	511.83	376.834
ACTR3	50.514	129.774	80.772	165.486
ACTR3B	5.073	4.836	9.272	5.131
ACTR3BP2	0	0	0.206	0
ACTR3C	0.221	0.403	0	0
ACTR5	9.706	18.136	13.393	18.28
ACTR6	24.485	24.584	21.429	20.205
ACTR8	36.838	39.093	27.199	35.599
ACTRT1	0	0	0	0.641
ACTRT2	0	0.403	0.206	0
ACVR1	49.852	33.451	14.424	13.47
ACVR1B	67.278	43.527	18.957	47.465
ACVR1C	0.221	0	0.618	0
ACVR2A	9.926	13.3	9.684	15.073
ACVR2B	2.647	2.015	1.854	2.245
ACVRL1	0	0.806	0	0
ACY1	13.456	8.06	6.182	8.338
ACY3	0.221	0	0.206	0
ACYP1	21.617	20.554	13.599	10.904
ACYP2	16.323	16.121	24.108	14.753
ADA	65.514	62.469	22.047	17.318
ADAD1	0	0	0	0
ADAD2	0	0	0	0
ADAL	54.264	32.645	10.715	12.508
ADAM1A	9.926	12.091	11.745	12.508
ADAM10	38.602	60.454	58.518	52.276
ADAM11	3.088	2.821	9.066	5.452
ADAM12	0	0	0	0
ADAM15	42.132	31.033	90.662	110.645
ADAM17	13.897	21.36	11.745	32.071
ADAM18	0	0	0	0
ADAM19	9.706	6.448	0.618	0.962
ADAM2	0	0	0	0
ADAM20	0	0	0	0
ADAM21	0	0	0	0
ADAM21P1	0	0	0.206	0
ADAM22	0.662	4.433	4.533	12.508
ADAM23	0.441	0	0.412	3.528
ADAM28	0	0	0	0
ADAM29	0	0	0	0
ADAM30	0	0	0	0
ADAM32	0	0.403	0	0.641
ADAM33	0	0.403	0	0
ADAM6	0	0	0	0
ADAM7	0	0	0	0
ADAM8	0.221	0.403	0	0.321
ADAM9	188.158	288.968	268.896	237.966
ADAMDEC1	0	0	0	0
ADAMTS1	0	1.209	0	0
ADAMTS10	3.75	4.433	2.473	2.245
ADAMTS12	0	0	0	0
ADAMTS13	1.765	2.821	0.412	0
ADAMTS14	0	0.403	0.206	0
ADAMTS15	44.337	45.542	0.824	1.924
ADAMTS16	0.441	0.403	1.03	0.321
ADAMTS17	0	0.403	0.412	0.641
ADAMTS18	0	0	0	0
ADAMTS19	0	0	0	0
ADAMTS2	0	0	0	0
ADAMTS20	0	0	0	0
ADAMTS3	0	0	0	0
ADAMTS4	0	0	1.648	0.641
ADAMTS5	0	0	0	0
ADAMTS6	0.662	0.403	0.618	1.283
ADAMTS7	0.221	0	6.8	8.659
ADAMTS8	0	0	0	0
ADAMTS9	0	0	0	0
ADAMTSL1	0	0	0.412	0.321
ADAMTSL2	0	0.403	0	0
ADAMTSL3	0	0	0	0
ADAMTSL4	2.426	5.239	12.363	15.715
ADAMTSL5	5.073	14.509	4.945	9.942
ADAP1	2.647	0.806	5.563	2.245
ADAP2	0	0	2.473	4.811
ADAR	291.833	298.641	611.765	511.211
ADARB1	1.544	4.836	14.63	17.318
ADARB2	0.221	0	0	0
ADAT1	27.132	9.673	14.011	12.828
ADAT2	11.25	15.315	18.545	13.791
ADAT3	0.221	0.806	0	0.321
ADC	0	0	0	0
ADCK1	28.014	11.285	10.509	6.414
ADCK2	7.941	6.851	14.836	11.866
ADCK3	29.999	22.972	60.373	53.879
ADCK4	18.97	28.615	18.751	16.998
ADCK5	3.75	1.612	2.267	0.321
ADCY1	1.103	0	0	0
ADCY10	0.221	0.403	0	0
ADCY2	0.221	0	0	0
ADCY3	18.529	28.615	36.677	49.389
ADCY4	0	0	0	0
ADCY5	0.441	1.209	3.091	4.49
ADCY6	10.588	7.254	8.654	6.735
ADCY7	9.706	12.091	28.641	33.675
ADCY8	0	0	0	0
ADCY9	10.809	2.015	4.327	6.735
ADCYAP1	0	0	0	0
ADCYAP1R1	0	0	0.206	0
ADD1	28.455	15.315	11.127	25.657
ADD2	0	0.403	6.594	10.904
ADD3	5.735	7.254	0	0.641
ADH1A	0	0	0	0
ADH1B	0	0	0	0
ADH1C	0	0	0	0
ADH4	0	0	0	0
ADH5	142.497	108.01	103.025	108.4
ADH6	0	0	0	0
ADH7	0	0	0	0
ADHFE1	1.544	0.806	1.236	0.321
ADI1	7.5	14.912	57.282	91.402
ADIG	0	0	0	0
ADIPOQ	0	0	0	0
ADIPOR1	104.116	89.471	144.236	141.754
ADIPOR2	61.543	37.078	70.675	51.634
ADK	12.794	17.733	12.775	11.225
ADM	145.144	166.449	5.357	11.225
ADM2	0	0.806	0	0
ADNP	0.662	2.418	1.648	6.414
ADNP2	25.808	46.751	23.49	65.425
ADO	19.853	44.736	24.52	32.392
ADORA1	2.426	1.612	19.163	18.601
ADORA2A	13.676	22.972	10.096	4.811
ADORA2B	166.541	117.28	76.239	93.326
ADORA3	0	0	0	0
ADPGK	9.706	6.851	5.769	9.621
ADPRH	7.72	1.612	0	0
ADPRHL1	4.412	6.045	5.975	4.49
ADPRHL2	28.455	23.778	15.66	26.94
ADRA1A	0	0	0	0
ADRA1B	11.691	6.448	0.206	0
ADRA1D	0	0	0	0
ADRA2A	0.221	0.806	0	0
ADRA2B	0.221	2.821	0	0.321
ADRA2C	6.176	24.584	7.83	5.131
ADRB1	10.367	25.39	2.679	0.962
ADRB2	5.956	2.821	0.412	2.566
ADRBK1	5.515	10.882	3.709	9.301
ADRBK2	0.221	0	1.03	0.962
ADRM1	630.871	417.532	230.777	228.024
ADSL	172.497	215.618	163.604	208.461
ADSS	9.265	10.076	12.363	12.187
ADSSL1	0	0	0.412	0.321
AEBP1	0	0	0	0
AEBP2	28.897	29.018	95.195	89.478
AEN	16.985	34.257	37.501	46.182
AES	272.863	475.165	233.456	246.305
AFAP1	98.601	97.935	32.144	36.24
AFAP1L1	34.191	28.212	4.533	2.886
AFAP1L2	125.071	178.136	1.236	1.604
AFF1	31.323	36.675	34.823	36.24
AFF2	0	0.403	0	0
AFF3	4.632	4.836	0.206	0
AFF4	136.762	155.164	241.492	234.118
AFG3L2	19.191	29.421	39.974	47.144
AFM	0.221	0	0	0
AFMID	1.324	1.209	1.236	0.641
AFP	0	0	0	0
AFTPH	39.705	40.705	26.168	27.581
AGA	4.632	11.285	2.267	4.169
AGAP1	105.219	79.396	40.18	51.955
AGAP11	0.221	0	1.854	1.924
AGAP2	0.882	1.209	1.648	0.962
AGAP3	55.587	31.436	46.774	32.392
AGAP5	3.529	4.836	2.267	3.528
AGAP6	3.309	2.821	5.151	8.018
AGAP7	0.882	2.015	0.824	2.245
AGBL1	0	0	0	0
AGBL2	1.544	2.821	0	0
AGBL3	0	0	0	0.321
AGBL4	0	0	0	0
AGBL5	10.147	11.688	1.648	3.207
AGER	1.985	0.403	0.824	2.245
AGFG1	1.103	0	0	0
AGFG2	16.985	9.673	7.624	10.263
AGGF1	37.058	59.244	71.706	53.238
AGK	0.662	0.403	1.236	0
AGL	38.382	39.093	23.696	15.394
AGMAT	9.926	16.927	0	0.321
AGMO	0	0	0	0
AGPAT1	151.983	181.361	152.478	164.845
AGPAT2	47.867	39.899	34.823	14.753
AGPAT3	39.264	16.524	29.465	25.657
AGPAT4	6.618	7.657	2.679	5.773
AGPAT5	26.47	24.987	90.044	69.915
AGPAT6	24.264	27.003	46.361	36.882
AGPAT9	78.528	49.572	29.465	29.826
AGPHD1	3.529	3.627	1.442	3.528
AGPS	36.396	91.083	73.148	63.5
AGR2	858.073	404.233	2.267	3.528
AGR3	0	0	0	0
AGRN	74.116	78.187	21.017	21.808
AGRP	0	0	0	0
AGT	0	0	0	0.321
AGTPBP1	2.647	3.224	6.8	13.47
AGTR1	0	0	0	0
AGTR2	0	0	0	0
AGTRAP	231.834	170.076	125.073	101.344
AGXT	0	0	0	0
AGXT2	0	0	0	0
AGXT2L1	0	0	0	0.321
AGXT2L2	12.573	8.06	15.66	6.735
AHCTF1	29.558	27.809	97.668	65.104
AHCY	84.263	29.824	140.527	161.958
AHCYL1	132.571	104.786	76.857	51.955
AHCYL2	0.441	4.433	2.885	4.169
AHDC1	5.515	2.015	0.206	0.641
AHI1	9.706	23.375	39.15	64.463
AHNAK	155.071	104.383	49.452	32.071
AHNAK2	100.586	245.441	51.513	46.503
AHR	16.985	38.69	3.297	2.245
AHRR	4.412	7.254	0.412	1.283
AHSA1	59.337	48.766	87.572	93.968
AHSA2	6.176	13.3	10.096	7.697
AHSG	0	0	0	0
AHSP	0	0	0	0
AICDA	0	0	0	0
AIDA	103.895	122.116	223.153	183.767
AIF1	0	0	0	0
AIF1L	10.588	11.688	17.72	19.243
AIFM1	230.731	220.857	209.76	240.532
AIFM2	26.911	10.882	6.8	7.697
AIG1	20.514	21.763	20.399	17.639
AIM1	22.279	36.675	0.412	0
AIM1L	0.441	0	0	0
AIM2	0	0	0	0
AIMP1	47.426	38.287	40.386	42.334
AIMP2	136.762	106.398	77.681	67.67
AIP	69.484	17.733	9.684	8.018
AIPL1	0	0	0	0
AIRE	0	0	0	0
AJAP1	0	0	0	0
AJUBA	103.013	69.32	14.424	9.942
AK1	5.073	2.821	22.872	30.467
AK2	104.116	242.62	331.536	313.975
AK3	53.381	74.559	93.135	86.912
AK4	14.559	26.197	97.256	87.554
AK5	15	15.315	12.775	9.301
AK7	0	0	0.412	2.566
AK8	0.441	1.612	1.236	0.641
AKAP1	14.117	10.882	11.333	14.111
AKAP10	1.544	4.836	2.679	7.056
AKAP11	95.292	85.844	136.818	87.554
AKAP12	574.842	712.546	9.89	14.111
AKAP13	1.324	1.209	0.618	2.886
AKAP14	0.882	0	0.206	0
AKAP17A	54.705	52.393	141.145	195.633
AKAP3	0	0	0	0
AKAP4	0	0	0.206	0
AKAP5	0	0	0	0.321
AKAP6	0.221	0.403	0	0
AKAP7	0.882	2.418	2.885	4.169
AKAP8	39.705	66.499	87.366	99.42
AKAP8L	76.763	70.932	62.639	64.783
AKAP9	11.25	19.748	16.896	19.884
AKD1	0	0	0	0
AKIP1	37.058	30.227	6.388	7.056
AKIRIN1	280.583	376.424	325.354	416.281
AKIRIN2	40.808	26.6	20.193	25.657
AKNA	1.544	0.806	0	0.641
AKNAD1	0	0	3.297	4.49
AKR1A1	50.514	74.156	27.817	14.432
AKR1B1	91.542	35.869	56.87	48.427
AKR1B10	0.221	0	0	0
AKR1B15	0	0	0	0
AKR1C2	0	0	2.267	1.924
AKR1C3	0	0.403	0.412	0.321
AKR1C4	0	0	0	0
AKR1CL1	0.221	0	0.618	0
AKR1D1	0	0	0	0
AKR1E2	0.882	1.209	4.533	4.811
AKR7A2	124.851	69.723	62.639	96.854
AKR7A2P1	0.221	0	2.473	4.811
AKR7A3	4.853	2.418	8.242	7.697
AKT1	50.514	35.466	42.24	62.859
AKT1S1	9.485	7.657	0	0
AKT2	2048.34	1426.7	96.844	128.605
AKT3	4.632	14.509	29.671	46.503
AKTIP	19.853	26.197	31.32	32.071
ALAD	3.75	2.418	5.769	4.811
ALAS1	32.426	9.673	13.187	11.546
ALAS2	0	0	0	0
ALB	0	0	0	0
ALCAM	47.205	52.796	0.824	1.924
ALDH16A1	12.353	13.3	14.424	8.659
ALDH18A1	51.837	53.199	84.275	100.382
ALDH1A1	0	0	158.247	262.661
ALDH1A2	0	0	0	0.321
ALDH1A3	10.588	2.015	3.297	7.056
ALDH1B1	22.058	12.897	7.212	6.735
ALDH1L1	0	0	0	0
ALDH1L2	2.206	2.821	0.618	1.604
ALDH2	10.809	12.091	1.03	0.962
ALDH3A1	2.647	1.209	1.442	1.604
ALDH3A2	2.868	5.239	6.388	5.131
ALDH3B1	29.558	31.033	9.272	7.056
ALDH3B2	0	0	0	0
ALDH4A1	20.956	18.136	28.641	26.619
ALDH5A1	1.324	1.209	7.83	5.773
ALDH6A1	0.221	0.403	1.854	5.452
ALDH7A1	68.822	60.857	600.226	470.16
ALDH8A1	0	0	0.206	0
ALDH9A1	86.91	96.323	189.155	331.293
ALDOB	0	0	0	0
ALDOC	10.147	20.957	14.63	13.149
ALG1	21.838	7.254	7.006	7.376
ALG10	8.382	6.448	15.866	12.828
ALG10B	25.147	14.912	22.872	23.091
ALG11	9.706	12.897	9.272	7.376
ALG12	13.676	10.076	7.212	4.811
ALG13	47.205	37.078	57.076	36.882
ALG14	4.191	4.836	4.327	2.886
ALG1L	0.662	1.612	2.061	1.604
ALG1L2	0	0	0	0
ALG2	45.44	31.436	102.407	58.369
ALG3	4.412	0.403	1.236	2.886
ALG5	12.573	21.36	22.047	27.902
ALG6	6.838	15.315	4.739	11.866
ALG8	18.088	22.166	9.89	7.376
ALG9	16.985	19.345	13.599	11.546
ALK	0	0	0	0
ALKBH1	18.088	10.076	17.926	16.035
ALKBH2	24.705	18.942	9.066	8.659
ALKBH3	29.779	43.527	27.199	23.733
ALKBH4	16.323	14.509	2.679	1.924
ALKBH5	101.91	98.338	180.294	210.065
ALKBH6	0.662	0	0	0
ALKBH7	8.162	16.121	20.811	21.488
ALKBH8	22.058	31.033	6.182	13.149
ALLC	0	0	0	0
ALMS1	3.309	3.627	2.061	4.811
ALOX12	0.221	0.403	0.206	0
ALOX12B	0.441	0	0	0
ALOX15	0	0	0	0
ALOX15B	0	0	0	0
ALOX5	0	0	0	0
ALOX5AP	1.103	0.806	0	0.321
ALOXE3	0.882	0	0.206	0.321
ALPI	0	0	0	0
ALPK1	3.75	5.642	14.63	8.659
ALPK2	0	0	0	0
ALPK3	0.662	0.806	0	0.321
ALPL	0	0	1.442	0
ALPP	0	0	0	0
ALPPL2	2.647	6.851	0.206	0.321
ALS2	37.279	31.033	20.605	15.394
ALS2CL	0.662	0.403	0.206	0
ALS2CR11	0	0	0.206	0
ALS2CR12	0.221	0	0	0
ALS2CR8	3.088	5.239	1.236	2.245
ALX1	0	0.403	0	0
ALX3	0	0	0	0
ALX4	2.206	1.612	1.442	0.962
ALYREF	513.079	304.686	321.027	331.293
AMACR	34.852	39.899	11.539	10.904
AMBN	0	0	0	0
AMBP	0	0	0	0
AMBRA1	20.514	27.809	24.726	25.336
AMD1	110.072	83.829	126.103	183.767
AMDHD1	0.441	0.403	0.412	0
AMDHD2	16.323	18.942	4.533	7.697
AMELX	0	0	0	0
AMELY	0	0	0	0
AMFR	40.587	94.711	102.201	126.039
AMH	0	0	0	0
AMHR2	0.441	0	0	0
AMICA1	0	0	0	0
AMIGO1	0	0.403	0.206	0.962
AMIGO2	12.794	10.479	0	0
AMIGO3	2.868	1.612	2.885	2.886
AMMECR1	44.779	46.751	23.284	42.013
AMMECR1L	25.588	32.242	30.908	34.957
AMN	0.662	0	0	0.321
AMN1	1.544	5.239	6.388	4.169
AMOT	7.941	12.494	0	0
AMOTL1	4.632	2.418	8.86	2.245
AMOTL2	197.643	158.791	103.438	98.458
AMPD1	0	0	0	0
AMPD2	22.279	18.136	22.047	25.977
AMPD3	31.323	18.942	10.715	6.093
AMPH	0	0	0	0
AMT	2.426	3.224	2.885	3.849
AMTN	0	0	0	0
AMY2A	0	0	0	0
AMY2B	0.221	1.209	2.061	3.528
AMZ1	1.324	0.806	0	0
AMZ2	5.735	10.479	5.151	11.866
AMZ2P1	0.441	1.209	0.206	1.924
ANAPC1	76.984	73.35	117.655	104.551
ANAPC10	24.705	24.181	45.537	59.331
ANAPC11	3.529	2.015	0.412	0.321
ANAPC13	259.628	159.194	118.891	86.592
ANAPC16	199.849	119.698	60.167	59.011
ANAPC2	13.235	8.463	10.303	4.811
ANAPC4	7.941	24.584	12.981	16.998
ANAPC5	52.278	210.378	165.253	171.58
ANAPC7	97.719	112.041	61.609	76.329
ANG	0	0	0	0
ANGEL1	23.603	18.136	45.949	51.314
ANGEL2	3.529	6.045	23.902	19.243
ANGPT1	0	0	0	0
ANGPT2	0.662	0.403	0	0.641
ANGPT4	0	0	0	0
ANGPTL1	0	0	0	0
ANGPTL2	0	0	0	0
ANGPTL3	0	0	0	0
ANGPTL4	39.264	27.809	3.091	5.452
ANGPTL5	0	0	0	0
ANGPTL6	0.441	0.403	0.412	0
ANGPTL7	0	0.806	0	0
ANK1	62.425	18.942	88.602	76.008
ANK2	0	0	0.824	1.924
ANK3	0	0	0	0
ANKAR	1.103	0.403	0.824	0.641
ANKDD1A	1.103	3.627	1.236	0.321
ANKFN1	0	0	0	0
ANKFY1	50.293	45.945	77.887	87.233
ANKH	6.618	4.836	1.442	0.641
ANKIB1	91.542	223.275	121.982	164.845
ANKK1	0	0	0	0.962
ANKLE1	0.441	0	0.206	0.321
ANKLE2	485.506	438.893	196.779	202.368
ANKMY1	7.059	5.239	6.594	4.811
ANKMY2	40.808	65.693	21.017	18.922
ANKRA2	3.309	6.851	5.975	11.225
ANKRD1	0	0.403	0	0
ANKRD10	16.764	22.166	7.006	7.056
ANKRD11	118.895	40.302	67.997	76.008
ANKRD12	111.395	195.869	118.891	161.638
ANKRD13A	29.779	46.751	16.896	17.639
ANKRD13B	31.544	24.181	32.35	25.657
ANKRD13C	35.073	18.942	26.581	44.899
ANKRD13D	12.132	8.867	10.096	4.811
ANKRD16	1.544	2.821	4.327	2.245
ANKRD17	39.264	18.942	50.07	32.712
ANKRD18A	2.647	6.045	2.061	15.073
ANKRD2	0	0	0.206	0.321
ANKRD20A4	6.397	5.239	0.412	1.604
ANKRD20A9P	28.014	37.078	35.647	48.427
ANKRD22	0	0	0.412	0.641
ANKRD23	4.632	3.224	3.709	12.187
ANKRD24	0.882	0	0.618	0.962
ANKRD26	2.426	7.254	11.745	27.26
ANKRD26P1	0	0	0	0
ANKRD26P3	0	0	0	0
ANKRD27	25.808	9.673	14.63	4.49
ANKRD28	46.764	47.154	39.15	29.505
ANKRD29	0.221	0.806	0.206	0.321
ANKRD30A	0	0	0	0
ANKRD30B	0	0	0	0
ANKRD30BL	0	0	0	0
ANKRD31	0.221	0	0.824	3.528
ANKRD32	12.353	15.718	24.314	33.675
ANKRD33	0	0	0	0
ANKRD33B	26.47	39.093	7.418	3.528
ANKRD34A	0.221	0	0.206	0
ANKRD34B	0	0	0	0.321
ANKRD34C	0	0	0	0
ANKRD35	0	0	0	0
ANKRD36	43.014	39.899	50.688	46.824
ANKRD36B	19.632	14.106	26.787	24.374
ANKRD37	0.662	2.418	0.618	1.924
ANKRD39	21.838	10.882	10.921	5.452
ANKRD40	85.587	97.532	71.088	67.67
ANKRD42	3.309	10.882	10.509	11.866
ANKRD44	5.073	4.433	3.091	4.811
ANKRD45	0	0	0	0
ANKRD46	0	0.806	0.824	3.207
ANKRD49	2.647	10.479	3.915	3.849
ANKRD5	8.603	4.433	0	0
ANKRD50	18.529	6.448	27.199	32.392
ANKRD52	105.439	99.95	47.392	73.442
ANKRD53	0	0	0	0.321
ANKRD54	36.838	37.078	44.301	34.637
ANKRD55	0	0	0	0
ANKRD6	5.735	2.821	5.151	4.49
ANKRD63	0	0	0	0
ANKRD65	0	0	0.206	0.641
ANKRD7	0	0	0	0
ANKRD9	1.765	2.821	8.448	9.301
ANKS1A	33.529	24.987	23.49	33.995
ANKS1B	2.426	3.224	0.618	0.321
ANKS3	6.397	4.433	1.236	1.924
ANKS4B	0	0	0	0
ANKS6	19.191	12.091	9.89	14.432
ANKUB1	0	0	0	0
ANKZF1	5.735	3.224	5.151	5.452
ANLN	520.138	440.505	372.334	417.564
ANO1	1.103	1.612	1.03	1.924
ANO10	13.014	20.957	10.096	17.96
ANO2	0	0	0	0
ANO3	0	0	0	0
ANO4	0	0	0	0
ANO5	3.971	4.836	0	0
ANO6	99.925	137.028	41.828	28.543
ANO7	0	0	0	0
ANO8	20.514	13.3	4.327	2.566
ANO9	7.279	17.33	0	0
ANP32A	27.132	44.736	20.605	30.788
ANP32AP1	2.206	6.045	3.297	7.376
ANP32B	105.219	172.897	277.963	392.549
ANP32C	5.073	0.806	2.267	2.886
ANP32D	0.441	0	0	0
ANP32E	44.558	61.663	97.668	109.041
ANPEP	555.872	571.488	0.824	4.811
ANTXR1	116.468	62.872	45.743	41.372
ANTXR2	212.202	136.625	305.367	373.947
ANXA1	501.829	510.631	2562.86	2432.26
ANXA10	0	0	0	0
ANXA11	589.842	363.93	303.925	221.61
ANXA13	0	0	0	0
ANXA2	727.707	2120.71	586.627	685.356
ANXA2P1	1.324	0.403	0.412	0.321
ANXA2P3	0.221	0	0	0
ANXA3	1.765	2.821	0	0
ANXA4	291.612	362.318	86.953	81.14
ANXA5	98.601	139.849	58.931	76.97
ANXA6	155.953	112.041	195.542	169.335
ANXA7	184.408	214.812	94.371	159.713
ANXA8L1	0	0.403	0	0
ANXA8L2	0	0	0	0
ANXA9	2.206	4.433	1.854	0.641
AOAH	0	0	0	0
AOC2	0	0.403	5.151	4.811
AOC3	0.221	0	1.442	1.924
AOX1	0	1.209	0	0
AP1AR	1.324	4.433	4.739	2.566
AP1B1	56.911	33.048	45.331	56.766
AP1B1P1	0	0	0	0
AP1G1	137.203	92.695	184.003	160.034
AP1G2	14.117	22.972	35.441	35.599
AP1M1	240.657	247.86	184.415	262.661
AP1M2	2.647	0.403	0	0
AP1S1	13.676	11.688	15.454	25.336
AP1S2	8.603	22.972	32.556	54.841
AP1S3	8.162	15.315	1.236	3.207
AP2A1	64.19	70.529	79.536	110.324
AP2A2	163.673	116.474	97.256	84.988
AP2B1	647.415	621.865	521.102	657.455
AP2M1	706.531	468.716	430.44	339.952
AP2S1	138.086	113.653	141.763	111.928
AP3B1	56.911	144.282	119.509	140.471
AP3B2	0.221	0	1.03	0.641
AP3D1	69.925	16.927	23.284	9.301
AP3M1	111.616	116.071	97.256	84.667
AP3M2	5.515	4.03	9.272	5.773
AP3S1	2.426	10.076	7.212	14.432
AP4E1	3.75	7.657	3.091	8.659
AP4M1	9.485	6.851	5.357	5.131
APAF1	4.191	5.642	4.121	3.207
APBA1	0	0	0.206	0
APBA2	0	0	5.563	5.131
APBA3	27.794	34.66	36.471	20.525
APBB1	9.926	4.433	22.46	18.922
APBB1IP	0	0	0	0
APBB2	5.073	5.239	2.061	4.811
APBB3	1.103	1.612	1.03	1.604
APC	33.308	29.824	35.853	41.051
APC2	3.088	2.015	1.236	3.528
APCDD1	0	0	0.206	0.962
APCDD1L	0	0	0	0
APCS	0	0	0	0
APEH	111.836	57.632	38.944	50.351
APEX2	20.073	51.99	46.361	59.011
APH1A	168.085	208.363	211.614	168.052
APH1B	11.912	16.927	8.036	4.169
API5	80.072	134.207	103.231	163.562
APIP	41.69	29.421	47.186	40.409
APLF	1.765	6.045	0.824	2.886
APLN	1.324	0.403	0.206	0
APLNR	0	0	0.206	0
APLP1	21.838	35.869	5.151	5.131
APOA1	0.221	0	0	0
APOA1BP	96.836	72.141	79.742	50.672
APOA2	0	0	0	0.641
APOA4	0	0	0	0
APOA5	0	0	0	0
APOB	0	0	0	0
APOBEC1	0	0	0	0
APOBEC2	0	0	0	0
APOBEC3B	9.265	3.627	19.575	18.28
APOBEC3C	32.205	15.315	57.076	69.273
APOBEC3D	9.485	9.27	2.473	0.641
APOBEC3F	0.662	2.821	4.121	2.886
APOBEC3H	0	0	0	0
APOBEC4	0	0	0	0
APOBR	0	0	0.206	0.321
APOC1	10.147	6.851	2.885	6.093
APOC3	0	0	0	0
APOC4	0	0	0	0
APOD	0.441	0	0	0
APOE	364.626	978.138	1.442	1.924
APOF	0	0	0	0
APOH	0	0	0	0
APOL1	29.558	27.003	6.388	5.131
APOL2	1.324	2.418	0	0
APOL3	3.309	3.627	1.648	1.283
APOL4	0	0	0	0
APOL5	0	0	0	0
APOL6	14.117	23.375	6.594	4.169
APOM	3.088	3.627	2.679	4.49
APOO	71.69	46.348	59.549	43.617
APOOL	8.162	6.045	13.805	10.583
APP	384.478	398.187	228.51	160.034
APPBP2	75.66	78.993	116.213	111.607
APPL1	11.029	43.124	31.732	33.995
APPL2	21.617	18.942	17.102	17.318
APRT	218.599	124.131	158.659	282.224
APTX	18.97	29.018	17.102	16.356
AQP10	0	0	0	0
AQP11	0	0.806	0	0
AQP12A	0	0	0	0
AQP12B	0	0	0	0.321
AQP2	0	0	0	0
AQP3	2.206	1.209	0.412	0.321
AQP4	0	0	0	0
AQP5	0	0	0	0
AQP6	0	0.403	0	0
AQP7	0	0	0	0
AQP7P1	0	0	0	0
AQP8	0	0.403	0	0
AQP9	0	0	0	0
AQPEP	0	0	0	0.962
AQR	33.97	50.781	44.507	88.516
AR	0	0	0	0
ARAF	142.718	76.978	108.383	61.576
ARAP1	23.823	30.63	8.036	5.773
ARAP2	2.206	5.239	0	0
ARAP3	1.765	0.806	0.206	2.245
ARC	7.5	5.239	0.824	1.604
ARCN1	174.262	329.27	153.096	236.042
AREG	11.912	8.463	239.431	134.057
ARF1	434.551	246.65	645.557	910.815
ARF3	287.642	254.308	143.205	90.119
ARF4	125.512	245.038	143.411	300.184
ARF5	477.344	636.777	332.566	407.301
ARF6	0	0	0	0
ARFGAP1	18.088	13.703	12.981	14.432
ARFGAP2	4.853	9.27	5.357	3.849
ARFGAP3	33.749	58.035	33.792	34.637
ARFGEF1	1.324	4.03	2.061	5.773
ARFGEF2	29.338	21.36	25.344	26.94
ARFIP1	12.353	13.703	5.975	9.301
ARFIP2	116.248	164.837	42.034	56.445
ARFRP1	23.382	36.272	16.278	8.98
ARG1	0	0	0	0
ARG2	2.206	1.209	10.715	16.356
ARGFX	0	0	0	0
ARGLU1	9.044	38.287	41.004	63.18
ARHGAP1	125.733	85.844	78.505	91.402
ARHGAP10	3.971	6.851	5.563	4.811
ARHGAP11A	134.556	78.993	76.651	64.783
ARHGAP11B	31.764	23.778	32.762	31.109
ARHGAP12	16.323	22.166	54.81	68.311
ARHGAP15	0	0	0	0
ARHGAP17	90.44	66.902	35.029	119.945
ARHGAP18	10.147	14.912	11.333	8.659
ARHGAP19	15.882	6.851	2.267	3.207
ARHGAP20	0	0	0	0
ARHGAP21	5.073	13.3	10.921	6.414
ARHGAP22	1.985	3.224	0	0
ARHGAP23	13.014	10.882	1.236	0.321
ARHGAP24	11.47	3.627	0	0.962
ARHGAP25	0.441	0	0	0
ARHGAP26	5.073	2.418	0.412	0.641
ARHGAP27	15.441	27.003	13.393	12.828
ARHGAP28	0	0	0	0
ARHGAP29	58.896	71.738	2.267	5.131
ARHGAP30	0	0	0	0
ARHGAP31	38.382	42.317	19.987	31.75
ARHGAP32	45.22	15.315	13.599	8.338
ARHGAP33	11.47	8.06	6.182	7.376
ARHGAP35	151.983	149.925	111.061	99.741
ARHGAP36	0	0	0	0
ARHGAP39	1.985	0.403	0.412	1.604
ARHGAP4	52.72	101.965	0	0
ARHGAP40	0	0	0	0
ARHGAP42	24.926	17.33	1.442	2.245
ARHGAP44	0	0	7.418	7.056
ARHGAP5	11.25	17.733	17.308	23.733
ARHGAP6	0	0	0	0
ARHGAP9	0.662	0	0.412	0
ARHGDIA	3.309	2.821	0	0.321
ARHGDIB	1.985	0.403	0	0
ARHGDIG	1.103	1.612	17.72	14.111
ARHGEF1	74.116	42.721	14.011	23.412
ARHGEF10	6.838	5.239	0	0
ARHGEF10L	20.735	27.406	27.405	29.826
ARHGEF11	39.926	64.081	42.034	79.536
ARHGEF12	439.845	392.545	172.877	250.795
ARHGEF15	0	0	0	0
ARHGEF16	22.5	6.045	2.267	2.886
ARHGEF17	55.587	53.602	19.781	20.846
ARHGEF18	14.338	13.703	10.096	10.583
ARHGEF19	14.779	13.703	11.745	6.093
ARHGEF2	58.675	47.154	41.828	31.109
ARHGEF25	0	0	0	0
ARHGEF3	15.661	14.509	6.182	5.131
ARHGEF33	0	0	0	0
ARHGEF35	21.397	13.3	0	0
ARHGEF37	4.632	6.448	1.854	3.849
ARHGEF38	0	0	0	0
ARHGEF40	4.412	2.015	1.854	2.245
ARHGEF5	55.587	19.748	0	0.962
ARHGEF6	24.264	66.902	1.236	2.245
ARHGEF7	14.559	10.076	12.363	10.583
ARHGEF9	5.956	5.642	10.303	16.356
ARID1A	148.894	74.559	39.15	50.031
ARID1B	33.97	43.527	0.206	0.962
ARID2	22.72	14.106	13.187	14.753
ARID3A	7.72	13.703	10.096	13.47
ARID3B	26.029	30.63	15.042	14.432
ARID3C	0	0	0	0
ARID4A	12.573	19.748	29.259	44.579
ARID4B	13.014	47.154	68.821	83.705
ARID5A	1.324	1.612	0.206	0.962
ARID5B	89.116	56.423	0.412	0.321
ARIH1	67.278	74.962	53.367	53.879
ARIH2	149.115	167.658	177.822	160.675
ARL1	93.969	151.537	82.832	127.642
ARL10	5.735	6.851	0	0
ARL11	0	0	0	0
ARL13A	0	0	0	0
ARL13B	8.823	24.181	11.333	9.301
ARL14	11.029	23.375	0.824	0.641
ARL15	0.662	9.27	5.357	3.528
ARL16	74.337	60.454	48.628	36.882
ARL17A	3.088	2.418	2.061	2.566
ARL2	183.305	88.262	33.586	19.884
ARL2BP	10.809	32.242	41.004	61.897
ARL3	46.764	23.778	15.042	11.866
ARL4A	8.162	6.448	9.684	5.131
ARL4C	15.661	31.436	63.464	46.182
ARL4D	1.103	2.418	0.618	1.283
ARL5A	0.662	5.239	2.679	6.414
ARL5B	113.38	216.021	181.737	139.188
ARL5C	0	0	0	0
ARL6	0.441	0.403	0.206	0.321
ARL6IP1	112.498	183.376	89.426	76.329
ARL6IP4	91.322	40.302	10.303	11.546
ARL6IP5	39.264	39.496	60.167	86.912
ARL6IP6	96.395	87.053	61.197	90.761
ARL8A	25.588	55.617	74.59	75.687
ARL8B	151.762	157.985	137.436	111.928
ARL9	0.441	0.403	0	0.321
ARMC1	71.91	77.784	50.688	63.18
ARMC10	28.014	32.645	26.787	21.488
ARMC12	1.765	3.224	1.648	3.528
ARMC2	1.985	2.015	0	1.604
ARMC3	0	0.806	0.206	0
ARMC4	0	0	0.412	0.321
ARMC5	15.661	5.239	6.388	2.886
ARMC6	11.691	4.433	4.327	3.207
ARMC7	17.206	16.524	20.193	37.202
ARMC8	94.41	98.741	79.742	116.097
ARMC9	102.13	135.013	39.15	55.162
ARMCX1	6.838	7.254	0	0
ARMCX2	0	0	4.327	2.566
ARMCX3	9.485	10.076	16.896	7.697
ARMCX4	0	0	0	0
ARMCX5	10.588	18.942	9.89	19.563
ARMCX6	1.765	2.821	4.533	8.659
ARMS2	0	0	0	0
ARNT	67.94	45.139	53.985	66.708
ARNT2	34.191	33.451	0.412	0
ARNTL	2.206	4.836	4.945	7.056
ARPC1A	116.027	184.585	160.926	150.733
ARPC1B	189.041	166.046	95.608	85.309
ARPC2	797.191	559.397	478.45	694.336
ARPC3	22.5	39.093	9.684	38.164
ARPC5	331.759	324.837	231.807	164.845
ARPC5L	8.382	14.106	0.824	0
ACTRT3	7.5	6.045	13.599	17.96
ARPP19	173.82	90.277	55.016	46.503
ARPP21	0	0	0	0
ARR3	0	0	0	0
ARRB1	123.527	38.287	10.509	5.131
ARRB2	45.882	35.466	72.324	84.347
ARRDC1	35.514	29.018	18.957	10.904
ARRDC2	32.426	28.615	21.017	23.412
ARRDC3	17.206	38.287	38.532	28.222
ARRDC4	4.191	3.627	0	0.641
ARRDC5	0	0	0	0
ARSA	14.338	14.509	6.182	2.245
ARSB	16.103	23.375	10.715	7.376
ARSD	4.632	3.224	9.066	12.828
ARSE	0.221	0	0	0
ARSF	0	0.403	0	0
ARSG	1.544	2.821	0	0
ARSH	1.103	0	0.412	0
ARSI	16.764	27.406	0	0
ARSJ	9.044	34.66	0.206	0.962
ARSK	13.676	10.479	12.981	15.394
ART1	0	0	0	0
ART3	0	0	0	0
ART4	0	0	0	0
ART5	0	0.403	0	0.321
ARTN	0	0	0	0.321
ARV1	13.897	15.718	24.726	19.563
ARVCF	5.735	6.851	1.03	0.962
ARX	0	0	0.412	0.641
AS3MT	7.941	20.554	12.981	24.695
ASAH1	18.529	36.675	13.393	15.394
ASAH2	0	0	0	0
ASAH2B	23.382	14.106	11.127	9.621
ASAP1	78.087	136.625	95.608	173.825
ASAP2	342.788	227.305	94.989	115.455
ASAP3	7.279	5.642	2.885	2.245
ASB1	117.351	53.199	18.751	28.222
ASB10	0	0	0	0
ASB11	0	0	0	0
ASB13	8.823	5.239	4.121	0.962
ASB14	0	0	0	0
ASB15	0	0	0	0
ASB16	0	0	0	0
ASB17	0	0	0	0
ASB18	0	0	0	0
ASB2	0	0	0	0
ASB4	2.426	0	0	0.321
ASB5	0	0	0	0
ASB6	18.75	12.897	53.367	30.788
ASB7	9.485	2.015	2.885	1.924
ASB8	18.529	13.703	11.127	10.583
ASB9	2.206	2.015	0.618	2.566
ASB9P1	3.088	4.433	2.679	4.811
ASCC1	35.293	27.003	2.061	3.207
ASCC2	14.779	13.3	13.599	11.225
ASCC3	45.44	74.559	52.955	59.011
ASCL1	0	0	0	0
ASCL3	0	0	0	0
ASCL4	0	0	0	0
ASF1A	54.925	81.411	91.487	68.953
ASF1B	132.571	44.333	98.904	118.021
ASGR1	0.221	0.403	0.206	0
ASGR2	0	0	0	0
ASH1L	90.881	40.302	94.577	79.857
ASH2L	19.632	27.406	30.496	39.127
ASIP	0	0	0	0
ASL	102.13	96.323	70.881	77.932
ASMT	0	0	0	0
ASMTL	16.985	20.957	123.218	98.458
ASNA1	77.204	60.454	88.19	94.289
ASNS	41.69	41.914	10.509	12.828
ASNSD1	43.235	38.287	60.167	35.599
ASPA	0	0	0	0
ASPDH	0	0	0	0
ASPG	0	0	0	0
ASPH	49.411	58.438	39.768	51.955
ASPHD1	98.822	98.741	101.789	124.756
ASPHD2	0	0	1.236	1.283
ASPM	4.632	7.657	38.119	69.594
ASPN	0	0	0	0
ASPRV1	0.221	0.806	0.206	0
ASRGL1	0.221	2.418	0	0
ASS1	20.735	51.587	18.339	42.013
ASTE1	9.485	10.076	14.836	11.225
ASTL	0.221	1.612	0.206	0.641
ASTN1	0	0	0	0
ASTN2	0	0	0	0
ASUN	36.838	39.899	51.513	78.895
ASXL1	42.793	31.436	5.563	4.49
ASXL2	55.367	34.257	43.889	52.917
ASXL3	0	0	0	0
ASZ1	0	0	0	0
ATAD1	124.63	169.673	108.589	139.509
ATAD2	48.308	22.166	20.605	15.073
ATAD2B	1.324	3.224	2.267	6.414
ATAD3A	34.411	17.733	33.174	16.035
ATAD3B	39.485	15.718	21.635	12.828
ATAD3C	7.941	12.494	0	0.321
ATAD5	1.103	2.015	2.061	8.338
ATAT1	4.632	11.285	3.709	3.528
ATCAY	0	0	0	0
ATE1	13.676	9.27	3.503	3.849
ATF1	28.676	29.018	18.751	15.715
ATF2	69.263	43.93	48.216	56.124
ATF3	53.381	40.302	5.151	3.528
ATF4	151.321	75.768	120.746	139.509
ATF5	275.73	324.837	418.283	491.006
ATF6	32.646	97.532	181.737	217.441
ATF6B	111.616	38.287	55.222	83.064
ATF7	30.22	14.912	12.569	8.338
ATF7IP	18.75	15.315	75.002	48.748
ATF7IP2	6.838	10.882	1.236	0.962
ATG10	41.029	56.423	18.545	32.071
ATG12	45.44	81.008	61.197	89.799
ATG13	0.662	0	0	0
ATG14	11.912	11.688	13.599	11.225
ATG16L1	16.323	31.033	31.732	56.445
ATG16L2	2.868	2.821	0.618	1.924
ATG2A	39.926	35.466	4.121	5.452
ATG2B	6.618	11.688	46.361	48.427
ATG3	32.646	53.199	61.609	144.64
ATG4A	5.073	4.836	2.267	3.528
ATG4B	171.394	112.041	99.316	101.344
ATG4C	4.191	4.433	7.83	7.056
ATG4D	3.529	0.403	4.945	6.093
ATG5	28.235	48.363	28.847	32.071
ATG7	19.411	18.539	9.478	9.301
ATG9A	27.132	34.257	12.157	16.356
ATG9B	0	0	0	0.321
ATHL1	38.823	66.902	10.096	18.601
ATIC	381.17	375.618	224.595	303.391
ATL1	0.221	0.403	0	0
ATL2	53.381	54.408	79.948	79.857
ATL3	74.999	71.738	31.938	37.844
ATM	5.956	12.494	7.212	9.621
ATMIN	83.822	119.698	114.77	95.892
ATN1	108.527	77.784	252.412	172.221
ATOH1	0	0	0	0
ATOH7	0	0.403	0.206	0
ATOH8	3.529	1.612	0.206	0
ATOX1	432.566	407.457	216.147	130.529
ATP10A	0.441	2.821	0	0
ATP10B	0	0	0	0
ATP10D	0.882	1.612	0.206	0.962
ATP11A	105.439	51.99	30.083	31.109
ATP11B	65.734	62.066	45.743	60.293
ATP11C	37.279	76.574	23.078	37.844
ATP12A	0	0	0.206	0
ATP13A1	12.573	8.06	15.866	15.073
ATP13A2	26.25	18.942	9.272	6.735
ATP13A3	73.234	57.229	107.559	312.371
ATP13A4	0	0	0.206	0
ATP13A5	0	0	0	0
ATP1A1	609.254	359.094	402.417	492.931
ATP1A2	0	0.403	0	0
ATP1A3	10.588	4.03	26.581	15.073
ATP1A4	0	0	0	0
ATP1B1	151.321	374.409	74.796	89.157
ATP1B2	0	0	0	0
ATP1B3	243.746	359.497	392.115	355.025
ATP1B4	0	0	0	0
ATP2A1	2.426	0.806	4.121	4.811
ATP2A2	41.029	56.02	34.823	56.445
ATP2A3	2.206	0.806	0	0
ATP2B1	58.455	104.786	12.157	4.811
ATP2B2	0	0	0	0
ATP2B3	0.662	0.403	0	0
ATP2B4	182.423	159.194	169.374	231.552
ATP2C1	0	0	0	0
ATP2C2	0	0	0	0
ATP4A	0	0	0	0
ATP4B	0	0	0	0
ATP5A1	135.439	265.19	454.548	591.709
ATP5B	830.72	916.073	627.631	557.714
ATP5C1	55.367	37.884	99.935	233.477
ATP5D	155.953	205.542	157.629	153.62
ATP5E	44.117	62.469	33.38	24.695
ATP5EP2	0	0	0.206	0
ATP5F1	66.837	26.6	96.638	68.953
ATP5G1	364.405	194.66	102.819	69.594
ATP5G2	691.09	840.304	390.878	275.169
ATP5G3	379.405	243.023	557.986	309.164
ATP5H	886.749	912.849	616.504	482.668
ATP5I	166.1	103.577	60.579	84.988
ATP5J	8.603	16.121	9.478	8.338
ATP5L	883.66	1169.58	580.239	753.347
ATP5L2	1.985	2.015	1.854	2.245
ATP5S	30.661	44.736	38.944	42.013
ATP5SL	57.572	37.481	39.15	31.109
ATP6AP1	441.389	252.696	124.867	139.829
ATP6AP1L	0.662	1.209	0.824	0.641
ATP6AP2	180.658	226.499	350.698	279.338
ATP6V0A1	13.897	25.39	26.993	30.788
ATP6V0A2	1.765	4.836	3.915	2.566
ATP6V0A4	0	3.627	0	0
ATP6V0B	20.294	16.927	8.242	3.849
ATP6V0C	138.306	344.585	46.155	117.059
ATP6V0CP3	0	0.403	0	0
ATP6V0D1	45.22	29.824	39.15	56.766
ATP6V0D2	0	0	0	0
ATP6V0E1	358.449	484.837	238.195	262.34
ATP6V0E2	9.485	18.942	7.624	14.753
ATP6V1A	48.97	41.914	37.501	37.523
ATP6V1B1	0	0	1.648	4.169
ATP6V1B2	29.338	51.587	154.538	136.943
ATP6V1C1	48.087	68.917	22.46	33.675
ATP6V1C2	0	0.403	0	0
ATP6V1D	72.131	66.902	49.246	39.768
ATP6V1E1	179.114	146.701	125.073	128.605
ATP6V1E2	0.882	0.403	3.297	2.886
ATP6V1F	0.662	1.612	1.442	1.283
ATP6V1G1	252.348	370.379	385.933	323.596
ATP6V1G2	1.544	1.612	1.648	0
ATP6V1G3	0	0	0	0
ATP6V1H	27.573	43.93	45.537	70.235
ATP7A	29.779	20.151	9.066	6.093
ATP7B	2.206	13.703	7.418	8.659
ATP8A1	0.882	3.627	2.473	6.093
ATP8A2	0	0	0	0
ATP8B1	25.367	30.227	2.885	1.604
ATP8B2	10.147	10.479	22.253	17.318
ATP8B3	31.102	22.166	17.926	31.109
ATP8B4	0	0	0	0
ATP9A	23.382	18.942	9.272	7.376
ATP9B	11.691	18.942	0	0.321
ATPAF1	62.646	50.781	129.194	118.021
ATPAF2	21.617	16.524	14.836	13.149
ATPBD4	6.618	18.136	111.886	88.516
ATPIF1	40.146	60.857	60.785	72.801
ATR	28.676	43.527	45.949	56.124
ATRIP	5.735	2.821	4.533	2.566
ATRN	14.117	29.824	28.435	36.561
ATRNL1	2.868	9.27	0	0.641
ATRX	12.353	36.675	27.199	33.033
ATXN1	13.235	27.406	0.412	0.641
ATXN10	93.969	79.799	75.002	75.687
ATXN1L	52.499	35.063	47.186	49.069
ATXN2	18.088	13.703	24.108	33.675
ATXN2L	138.527	139.849	106.94	111.607
ATXN3	13.897	22.166	35.853	30.147
ATXN3L	0	0	0.412	0
ATXN7	3.088	0.403	0.618	0.641
ATXN7L1	3.529	4.433	2.885	4.811
ATXN7L2	4.853	3.627	2.885	3.849
ATXN7L3	1.765	1.612	3.503	5.452
ATXN7L3B	73.455	47.154	29.671	34.957
ATXN8OS	0	0	0	0
AUH	8.382	8.06	12.363	15.394
AUP1	126.174	52.393	80.772	73.122
AURKA	31.764	21.763	36.471	39.127
AURKAIP1	240.216	349.422	253.855	131.17
AURKAPS1	5.294	7.254	12.157	14.753
AURKB	14.117	2.418	13.393	11.866
AURKC	1.103	0.806	0.412	0
AUTS2	1.103	1.209	0.412	1.283
AVEN	25.808	11.688	15.66	16.035
AVIL	1.765	1.209	1.03	0
AVL9	26.47	15.718	13.393	15.394
AVP	0	0	0	0
AVPI1	14.559	11.285	51.101	62.859
AVPR1A	0	0	0	0
AVPR1B	0	0	0	0
AVPR2	0	0.403	0	0
AWAT1	0	0	0.206	0
AWAT2	0.221	0	0.206	0
AXDND1	0	0	0	0
AXIN1	25.147	22.569	13.599	10.583
AXIN2	1.103	1.612	0	1.283
AXL	16.764	9.673	4.533	10.583
AZGP1	0	0	0	0
AZI1	6.618	5.642	4.121	2.566
AZI2	27.352	31.033	18.751	16.035
AZIN1	22.058	30.63	43.683	66.708
AZU1	1.103	4.03	1.648	1.604
B2M	1460.27	1656.83	782.375	626.666
B3GALNT1	82.498	68.917	0.412	1.283
B3GALNT2	13.897	27.406	30.496	37.523
B3GALT1	1.103	0	0	0
B3GALT2	0	0	0	0
B3GALT4	11.691	8.867	0.824	1.924
B3GALT5	0	0	0	0
B3GALT6	12.573	18.942	10.921	18.601
B3GALTL	34.411	24.584	19.575	8.018
B3GAT1	0.221	0	0.412	1.604
B3GAT2	0	0	0.206	0
B3GAT3	18.75	3.627	4.739	5.131
B3GNT1	13.014	14.912	10.096	4.811
B3GNT2	3.088	8.867	9.89	15.394
B3GNT3	1.103	0.806	0	0
B3GNT4	0	0	0	0
B3GNT5	77.425	67.708	3.297	3.207
B3GNT6	0	0	0	0
B3GNT8	0	0	0	0
B3GNTL1	52.278	33.451	3.091	1.924
B4GALNT1	14.559	11.285	3.915	3.849
B4GALNT2	0	0	0	0
B4GALNT3	1.985	0.403	2.885	6.414
B4GALNT4	2.868	8.867	3.709	2.886
B4GALT1	8.162	30.227	6.594	3.849
B4GALT2	73.675	60.454	32.762	22.45
B4GALT3	41.69	30.227	38.532	39.447
B4GALT4	65.514	58.438	27.817	35.599
B4GALT5	20.956	27.809	25.344	45.861
B4GALT6	63.308	58.841	3.297	5.131
B4GALT7	7.5	1.612	4.327	3.207
NCR3LG1	11.25	9.27	6.594	5.452
B9D1	80.513	58.438	90.044	115.455
B9D2	8.382	9.673	6.594	6.093
BAALC	0	0	0	0
BAAT	0	0	0	0
BABAM1	14.117	10.479	41.828	40.409
BACE1	7.941	6.448	24.932	25.657
BACE2	6.838	11.688	10.509	25.015
BACH1	2.426	3.224	9.272	10.263
BACH2	1.544	2.821	0.824	0.962
BAD	56.911	45.542	26.787	30.147
BAG1	20.073	29.018	9.89	15.394
BAG2	55.587	46.348	27.611	17.96
BAG3	607.71	507.407	277.756	361.44
BAG4	16.544	22.569	43.889	59.011
BAG5	0	0.403	1.03	1.604
BAG6	471.83	193.854	128.782	67.67
BAHCC1	49.852	65.29	1.236	1.604
BAHD1	31.323	37.884	47.598	28.543
BAI1	5.515	3.224	9.684	5.131
BAI2	33.308	30.227	8.448	11.546
BAI3	0	0	0	0
BAIAP2	264.48	227.708	53.161	56.766
BAIAP2L1	213.746	140.252	14.011	25.015
BAIAP2L2	0	0	0	0
BAIAP3	12.573	10.076	7.418	6.093
BAK1	55.367	33.048	54.191	46.182
BAMBI	2.647	8.06	6.182	3.528
BANF1	168.526	83.023	28.229	27.26
BANF2	0	0	0	0
BANK1	0.662	5.239	0.412	1.283
BANP	15.22	12.494	6.594	10.263
BAP1	104.778	62.872	78.299	71.518
BARD1	32.646	20.957	22.047	16.356
BARHL1	0	0	0	0
BARHL2	0	0	0	0
BARX1	49.411	117.683	0	0.321
BARX2	3.088	6.448	7.006	6.093
BASP1	8.823	24.584	0.206	0.321
BASP1P1	0	0	0	0
BATF	0	0	0	0
BATF2	0.221	0	0	0
BATF3	1.324	0	0.412	0.962
BAX	43.676	54.005	64.082	44.258
BAZ1A	31.764	61.26	100.347	95.892
BAZ1B	13.014	15.718	19.163	21.167
BAZ2A	102.792	105.189	47.186	80.498
BAZ2B	33.529	54.408	22.253	15.073
BBC3	7.059	2.821	2.679	6.414
BBOX1	0	0	0	0
BBS1	26.911	20.957	12.363	14.111
BBS10	2.647	0.806	2.061	0.321
BBS12	5.073	6.045	2.473	3.207
BBS2	71.91	51.99	63.258	77.291
BBS4	12.794	13.703	5.151	6.735
BBS7	5.735	12.494	15.866	7.697
BBS9	16.764	32.242	21.635	14.111
BBX	63.308	64.484	23.902	41.051
BCAM	11.25	14.912	17.308	16.998
BCAN	0	0.403	0	0
BCAP29	47.205	135.416	63.464	56.124
BCAP31	5.073	6.851	6.8	6.414
BCAR1	0	0	0.206	0
BCAR3	15.882	27.406	64.082	56.766
BCAS1	3.309	7.254	0	0
BCAS2	118.233	77.784	117.861	151.696
BCAS3	4.853	2.015	12.981	42.013
BCAS4	50.293	44.736	9.272	3.849
BCAT1	4.191	7.657	0.206	0
BCAT2	31.985	41.511	89.632	125.077
BCCIP	251.245	228.917	288.883	352.46
BCDIN3D	3.529	2.418	1.03	1.283
BCHE	0	0	0	0
BCKDHA	7.72	4.03	14.424	11.546
BCKDHB	7.059	9.673	24.314	19.243
BCKDK	88.454	63.678	49.246	150.092
BCL10	10.147	45.542	19.987	50.031
BCL11A	0	0	0	0
BCL11B	0	0	0	0
BCL2	0	0	4.739	3.528
BCL2A1	2.206	7.657	0	0
BCL2L1	213.967	153.955	101.995	97.816
BCL2L10	0.662	0.403	0	0
BCL2L11	17.426	20.957	18.545	19.884
BCL2L12	58.014	45.945	62.227	106.476
BCL2L13	35.514	16.121	20.193	18.922
BCL2L14	0.221	0	0	0
BCL2L15	0.221	0	0	0.321
BCL3	5.294	14.106	4.327	0.641
BCL6	21.397	10.882	7.212	4.49
BCL6B	0.441	1.209	0	0
BCL7A	10.147	6.045	2.885	2.566
BCL7B	17.206	9.673	11.333	13.149
BCL7C	26.25	23.375	20.399	10.583
BCL9	2.868	6.851	12.157	16.998
BCL9L	210.658	218.036	14.218	13.47
BCLAF1	89.998	125.743	140.115	152.337
BCMO1	0.221	0	0.206	0.321
BCO2	0.441	0.403	0.206	0.321
BCOR	139.189	133.804	164.635	198.199
BCORL1	2.647	0.806	1.442	0.962
BCR	23.603	14.509	26.375	19.563
BCRP2	0	0	0.206	0
BCRP3	24.485	12.897	19.369	15.394
BCS1L	54.484	39.899	53.573	64.463
BDH1	5.515	3.224	60.991	97.816
BDH2	2.426	2.418	9.684	8.018
BDKRB1	0	0	0	0
BDKRB2	0	0	0	0
BDNF	0	0	0	0
BDP1	0.882	2.418	4.533	21.488
BEAN1	0	0	3.503	3.528
BECN1	37.279	38.69	49.246	70.877
BEGAIN	15.441	20.554	19.987	35.599
BEND2	0	0	0	0
BEND3	8.823	11.285	16.69	14.111
BEND4	0	0	0.206	0
BEND5	0	0	0	0
BEND6	7.941	10.882	0	0
BEND7	0	0	0	0
BEST1	0.221	0	0	0
BEST2	0	0	0.206	0.321
BEST3	0	0	0	0
BEST4	0.221	0	0.412	0
BET1	83.381	109.622	100.553	84.988
BET1L	72.131	101.965	32.144	36.882
BET3L	0.221	0	0	0
BEX1	0.221	0	1.03	0.962
BEX2	0	0.403	0	0
BEX4	0.662	0.403	0	0
BEX5	0	0	0	0
BFAR	166.762	109.219	51.719	50.351
BFSP1	14.559	11.285	28.229	17.318
BFSP2	0	0	0	0
BGLAP	9.926	4.433	9.272	6.093
BGN	0	0	0	0
BHLHA15	0	0	0	0
BHLHB9	0	0	0	0
BHLHE22	0	0	0	0
BHLHE23	0	0	0	0
BHLHE40	137.645	133.804	45.743	121.228
BHLHE41	66.837	105.189	5.357	4.49
BHMT	0	0	0	0
BHMT2	0	0	0	0
BICC1	0.221	0.806	0	0
BICD1	1.103	2.015	6.182	8.659
BICD2	43.014	20.957	60.991	48.748
BIK	0	0.806	2.061	3.528
BIN1	1.765	0.403	1.236	2.566
BIN2	0	0	0	0
BIN3	16.764	10.882	32.35	30.788
BIRC2	270.877	461.059	113.122	140.15
BIRC3	174.041	180.958	10.509	15.394
BIRC5	157.718	55.214	84.893	104.872
BIRC6	22.5	23.778	36.059	29.185
BIRC7	3.309	4.836	1.03	0.321
BIRC8	0	0	0.206	0
BLCAP	0.441	1.209	0.412	0
BLID	3.971	5.239	0	0
BLK	0	0	0	0
BLM	27.352	20.957	15.248	16.035
BLMH	4.632	14.912	12.981	14.432
BLNK	0	0	0.206	0.321
BLOC1S1	41.69	47.96	13.599	18.28
BLOC1S2	20.514	36.272	26.168	29.826
BLOC1S3	3.75	2.821	0.206	0
BLVRA	15.22	35.063	7.418	13.47
BLVRB	109.63	97.935	190.803	143.999
BLZF1	100.586	142.67	126.309	191.784
BMF	4.853	10.076	1.03	1.283
BMP1	4.632	4.433	11.539	16.035
BMP10	0	0	0	0
BMP15	0.221	0	0	0
BMP2	0.221	1.209	0.206	0
BMP2K	24.705	32.242	18.545	22.129
BMP3	0	0	3.091	5.131
BMP4	0.662	0.806	0	0
BMP5	12.794	17.33	0.206	0.321
BMP6	48.087	26.197	1.03	1.283
BMP7	8.162	5.642	48.01	29.505
BMP8A	0.662	0	0.206	0
BMP8B	5.294	3.224	5.563	5.452
BMPER	0	0	0	0
BMPR1A	35.735	62.469	37.913	38.485
BMPR1B	0	0	0.206	0.321
BMPR2	82.498	282.923	68.409	74.405
BMS1	61.543	75.768	99.523	117.38
BMX	0	0	0	0
BNC1	0	0	0	1.283
BNC2	3.75	4.836	1.854	1.283
BNIP1	16.323	10.076	14.011	8.338
BNIP2	32.205	56.02	29.877	39.127
BNIP3	187.497	162.822	0.412	3.207
BNIP3L	46.543	35.466	71.912	52.917
BNIPL	0.221	0	0	0
BOC	0	0	0	0
BOD1	59.337	52.796	103.644	116.097
BOD1L1	10.809	12.091	16.072	11.225
BOK	0.221	0.403	0	0
BOLA1	3.309	1.612	0	0
BOLA2B	286.759	178.539	161.338	163.562
BOLA3	43.896	78.993	68.409	89.157
BOLL	0	0	0	0
BOP1	191.247	150.328	107.971	103.91
BORA	14.338	13.703	28.435	21.808
BPGM	16.544	10.076	2.679	2.566
BPHL	31.544	30.63	18.132	19.884
BPI	0	0	0.206	0
BPIFA2	0	0	0	0
BPIFA3	0	0	0	0
BPIFA4P	0	0	0	0
BPIFB1	0	0	0	0
BPIFB2	0	0	0	0
BPIFB3	0	0	0	0
BPIFB4	0	0	0	0
BPIFB6	0	0	0	0
BPIFC	0	0	0	0
BPNT1	5.515	1.209	1.236	7.376
BPTF	44.558	15.718	34.823	33.354
BRAF	46.323	65.29	56.458	90.44
BRAP	31.544	37.078	36.471	25.977
BRAT1	56.47	51.99	24.314	25.657
BRCA1	19.632	6.851	15.248	17.96
BRCA2	5.073	6.045	14.836	12.508
BRCC3	6.397	2.418	6.182	5.131
BRD1	37.279	28.615	27.199	31.75
BRD2	168.085	236.978	194.924	177.673
BRD3	14.559	14.106	22.047	15.394
BRD4	179.556	151.94	111.68	148.489
BRD7	22.279	24.987	53.573	43.937
BRD8	0	0.403	0	0
BRD9	60.219	87.456	79.124	100.061
BRDT	0	0	0	0
BRE	1.544	1.209	1.854	0.962
BREA2	0	0	0	0
BRF1	7.72	7.254	16.896	12.828
BRF2	4.191	0.806	15.042	10.263
BRI3	146.027	176.524	97.668	107.758
BRI3BP	50.514	82.62	17.926	38.806
BRIP1	2.426	3.224	5.769	6.735
BRIX1	98.16	116.474	194.306	250.153
BRK1	118.233	173.703	184.828	175.107
BRMS1	129.704	116.071	131.666	94.93
BRMS1L	3.088	10.882	13.805	11.866
BROX	21.397	53.602	56.664	68.632
MPC2	5.515	8.06	14.218	12.828
MPC1	34.191	74.156	92.311	93.968
BRPF1	0.221	0.403	0.618	1.283
BRPF3	85.146	45.542	62.227	60.935
BRS3	0	0	0	0
BRSK1	3.971	6.851	1.236	1.924
BRSK2	34.632	45.945	16.484	16.035
BRWD1	123.968	142.267	193.894	285.752
BRWD3	7.941	18.136	10.509	12.187
BSCL2	96.616	62.469	20.605	15.073
BSDC1	75.881	65.29	44.095	27.26
BSG	812.632	486.45	820.082	647.833
BSN	0.662	0.806	0.412	0.962
BSND	0	0	0	0
BSPH1	0	0	0	0
BSPRY	0.662	0	0	0
BST1	1.103	0.806	0.206	0.321
BST2	14.559	53.199	19.987	19.243
BSX	0.662	0	0	0
BTAF1	23.603	43.93	35.853	33.354
BTBD1	226.981	365.542	180.707	211.668
BTBD10	35.514	66.902	25.138	19.563
BTBD11	0.221	0	0	0
BTBD16	0.882	2.418	0	0
BTBD17	0	0	0	0
BTBD18	0	0	0	0
BTBD19	1.324	0.806	0	1.604
BTBD2	208.673	202.721	271.781	225.78
BTBD3	15.22	27.003	22.46	26.619
BTBD6	0	0	0	0
BTBD7	27.794	13.3	26.787	23.733
BTBD8	0.882	0.403	0.412	0.321
BTBD9	22.72	31.839	16.896	14.432
BTC	0	0	21.841	9.301
BTD	20.514	16.927	13.393	25.977
BTF3	287.642	455.417	965.142	1016.01
BTF3L4	6.618	28.212	17.102	23.091
BTF3P11	0	0	0.206	0
BTG1	46.764	132.998	11.745	16.998
BTG2	5.956	19.748	67.173	62.859
BTG3	5.735	16.927	19.781	15.715
BTG4	0	0	0	0
BTK	0	0	0	0
BTLA	0	0	0	0.321
BTN1A1	0	0	0	0
BTN2A1	33.308	24.584	22.047	25.015
BTN2A2	24.044	33.451	16.278	21.488
BTN3A1	1.765	2.418	2.473	0.962
BTN3A2	5.956	3.627	3.091	3.528
BTN3A3	0	0	0.824	1.924
BTNL2	0	0	0	0
BTNL3	0	0	0	0
BTNL8	0	0	0	0
BTNL9	0	0	0	0
BTRC	33.97	38.69	30.908	32.071
BUB1	62.425	49.975	59.755	91.402
BUB1B	72.793	20.957	36.471	42.013
BUB3	189.702	216.424	185.652	155.223
BUD13	20.294	16.927	7.418	3.849
BUD31	104.336	94.711	67.997	70.877
BVES	4.412	6.448	0.206	0.641
BYSL	82.719	70.529	49.658	48.427
BZRAP1	0	0	0	0
BZW1	689.326	793.554	815.343	746.612
BZW2	171.173	134.207	130.224	143.357
C10orf10	89.998	149.522	14.63	14.111
DNAJC9-AS1	0	0.403	0	0
C10orf105	0	0	0	0
C10orf107	0.441	1.612	0	0
C10orf108	0.662	0.403	0	0
C10orf11	3.75	5.239	0	0
C10orf111	0	0	0	0.321
C10orf113	0	0	0	0
C10orf116	50.514	35.869	450.221	194.671
C10orf118	57.572	45.542	19.369	27.581
C10orf12	59.117	26.6	26.375	15.715
C10orf120	0	0	0	0
TEX36	0	0	0	0
FUOM	3.971	1.209	0.824	0
C10orf128	0	0	0	0
C10orf129	0	0	0.206	0
C10orf131	0.221	1.612	0.206	0
LINC00619	0	0	0	0
C10orf137	19.411	35.869	45.125	34.957
SKIDA1	0	0	0	0
C10orf2	24.485	19.748	17.102	21.167
C10orf25	2.426	0.806	1.854	0
WBP1L	324.7	168.061	34.41	24.053
TBATA	0	0	0	0
R3HCC1L	47.867	42.317	28.435	33.675
C10orf32	20.956	21.763	24.314	39.127
C10orf35	18.75	6.851	1.442	0.962
CACUL1	19.632	42.721	47.186	27.26
C10orf47	5.515	4.836	9.478	18.922
C10orf53	0	0	0	0
C10orf54	15.882	7.254	21.429	9.942
C10orf55	3.75	10.479	2.473	1.604
C10orf62	0.662	0	2.885	3.207
C10orf67	0	0	0	0
C10orf68	0	0	0	0
C10orf71	0	0	0	0
C10orf76	11.47	7.657	9.89	8.338
PLEKHS1	0	0	0	0
C10orf82	0	0	0	0
C10orf88	6.838	5.642	5.563	10.904
C10orf90	0	0	0	0
C10orf91	20.073	10.479	0	0
C10orf95	0.221	0	0	0
CCDC172	0	0	0	0
C10orf99	0	0	0	0
C11orf1	13.014	10.882	10.096	9.301
C11orf10	272.422	123.325	77.063	43.937
C11orf16	0	0	0	0
VPS51	91.322	59.647	14.218	9.301
C11orf20	2.868	2.015	0	0
C11orf21	0	0	0	0
C11orf24	61.764	45.139	40.798	36.882
C11orf30	56.249	37.481	21.635	26.298
C11orf31	56.249	45.542	31.732	25.336
C11orf34	0.221	0	0	0
C11orf35	13.897	13.703	0.412	4.811
C11orf40	0	0	0	0
KIAA1549L	32.205	20.554	0.206	0
C11orf42	0	0	0	0
C11orf45	0.221	1.612	0	0
ARL14EP	10.809	14.106	13.187	13.47
C11orf48	10.588	7.657	4.121	2.886
C11orf49	52.499	59.244	14.424	11.546
ANAPC15	187.497	226.902	101.583	87.554
C11orf52	0	0	0	0
C11orf53	0	0	0	0
C11orf54	51.176	27.406	10.715	8.018
C11orf57	18.97	31.839	20.193	18.922
C11orf58	459.256	492.495	347.814	421.733
MSANTD2	6.838	11.285	7.212	14.432
C11orf63	6.397	8.06	0.412	1.604
C11orf65	0	0.403	0	0.321
AAMDC	35.073	37.884	9.066	9.942
C11orf70	23.161	32.645	40.18	35.919
C11orf73	48.749	57.632	16.896	27.581
C11orf74	3.309	9.27	5.563	7.056
C11orf75	5.073	8.867	6.388	5.131
C11orf80	1.103	6.045	4.327	6.414
C11orf82	19.191	17.733	7.212	6.735
C11orf83	23.161	20.957	13.805	20.525
C11orf84	29.999	20.151	16.278	17.639
C11orf85	0.441	0.403	0	0
C11orf86	0.221	0	0.206	0
C11orf87	0	0	0	0
C11orf88	0.221	0	0	0
C11orf9	2.206	4.836	2.473	5.452
C11orf91	0.221	0.403	0	0
C11orf92	0	0	0	0
C11orf93	0	0.403	0.206	1.283
C11orf94	0	0	0.206	0
C11orf95	0.221	0	0	0
C11orf96	0	0	0.206	0.641
C12orf10	37.72	19.345	10.096	7.376
CCER1	0	0	0	0
C12orf23	11.47	13.3	13.393	15.394
FAM216A	9.926	14.912	17.308	10.263
METTL25	1.103	1.209	0.412	0.321
C12orf29	86.469	80.605	35.647	36.561
LINC00612	0	0	0	0
FAM222A	1.103	4.836	0.824	1.283
KIAA1551	3.75	21.36	10.921	20.205
C12orf36	0	0	0	0
LINC00615	0	0	0	0
C12orf39	0	0	0	0
C12orf4	4.191	14.509	21.223	33.675
C12orf40	0	0	0	0
C12orf42	0	0	0	0
C12orf43	38.382	27.809	25.344	20.846
C12orf44	82.498	51.184	25.138	24.053
C12orf45	13.456	11.688	11.951	8.018
MAPKAPK5-AS1	9.485	9.27	10.096	9.942
C12orf49	28.235	27.003	9.272	6.414
C12orf5	12.794	16.927	51.925	33.033
C12orf50	0	0	0	0
HECTD4	9.485	7.254	9.272	8.659
C12orf52	19.191	8.463	7.006	9.621
C12orf54	0	0	0	0
C12orf56	0	0	0	1.283
C12orf57	45.44	43.124	99.11	258.492
TMEM52B	0	0	0	0
C12orf60	0.882	0.403	2.473	1.604
C12orf61	0.662	0	1.442	0.962
COX14	5.515	4.03	2.267	3.528
C12orf65	61.322	52.796	28.641	33.995
C12orf66	3.309	3.224	2.061	0.962
C12orf68	0.441	0.403	0	0
C12orf69	0	0	0	0
C12orf70	0	0	0	0
C12orf71	0	0	0.206	0
C12orf73	21.397	12.091	8.448	3.528
C12orf74	0	0	0	0
C12orf75	27.132	39.496	10.096	18.922
C12orf76	0	0	0	0
C12orf77	0	0	0	0
RGCC	9.926	20.554	1.648	5.131
TEX29	0	0	0	0
TEX26	0	0	0	0
TEX30	21.617	21.36	31.526	29.505
FAM216B	0	0	0	0
MEDAG	0.441	0	0	0
C13orf35	0	0	0	0
C14orf1	320.729	401.009	157.423	179.597
C14orf101	0.221	0.403	0.618	1.283
NRDE2	5.294	13.3	12.569	12.508
C14orf105	0	0	0	0
TMEM251	20.294	28.615	22.666	16.998
GPATCH2L	49.19	16.927	31.938	29.826
C14orf119	10.147	14.106	11.127	15.394
DTD2	4.412	2.821	8.86	17.639
GSKIP	25.367	17.33	22.666	19.243
VIPAS39	36.396	29.018	33.586	26.619
PCNXL4	48.749	56.423	59.343	100.061
C14orf142	16.985	6.851	18.339	28.222
L3HYPDH	8.823	15.718	7.212	11.546
C14orf159	0.882	0	1.648	1.924
C14orf162	0	0	0	0
C14orf166	57.352	114.459	240.873	214.875
C14orf166B	0	0	0	0
C14orf169	45.882	17.733	33.998	32.392
TMEM253	0	0	0.412	0
C14orf177	0	0	0	0
C14orf178	2.426	2.418	4.945	4.169
C14orf180	0	0	0	0
C14orf182	0	0	0.824	0.321
C14orf183	0	0	0	0
C14orf2	266.245	342.57	588.481	401.849
NOP9	6.397	5.642	7.212	7.697
C14orf23	0	0	0	0
C14orf28	1.324	3.224	1.854	2.566
C14orf37	0	1.209	0.618	0.321
CCDC175	0	0	0.206	0
C14orf39	0	0	0	0
ELMSAN1	38.382	48.766	31.526	39.768
CCDC176	1.544	0.806	1.03	1.924
SYNE3	16.544	6.448	1.236	1.283
C14orf79	1.544	4.836	11.745	10.263
C14orf80	17.647	10.882	7.624	4.169
C14orf93	5.073	6.851	3.297	1.604
FAM219B	23.603	17.733	8.036	8.659
C15orf23	172.276	66.499	147.738	160.996
EMC7	73.896	106.801	50.07	51.314
C15orf26	0.221	0.806	0	0
C15orf27	0	0	0	0
KATNBL1	1.103	5.642	3.091	3.207
C15orf32	0	0	0	0
FAM227B	4.191	8.867	6.182	9.942
HEXA-AS1	0	0	0	0
C15orf37	0.441	1.209	0	0.321
C15orf39	2.647	2.821	1.03	1.283
C15orf40	12.794	13.703	9.478	10.904
C15orf41	31.102	25.39	18.339	17.96
TICRR	8.823	3.627	4.945	14.753
C15orf43	0	0	0	0
VWA9	2.868	12.494	12.569	6.414
C15orf48	122.424	153.955	6.594	1.924
LINC00593	0	0	0	0
C15orf52	22.5	11.688	11.539	6.414
C15orf53	0	0	0	0
C15orf54	0	0	0	0
C15orf55	0	0	0	0
C15orf57	20.073	41.108	41.21	42.975
GDPGP1	21.176	8.463	4.121	3.849
C15orf59	2.426	4.03	7.418	4.49
C15orf60	0.221	0	0	0
C15orf61	3.529	2.015	1.03	1.604
C15orf62	2.647	1.209	1.03	0
HYPK	250.363	220.454	69.027	57.407
C16orf11	0.662	1.209	0	0
C16orf13	33.088	47.96	18.132	16.998
C16orf3	0.221	0	0.618	0
TSR3	54.043	63.275	17.926	39.447
C16orf45	134.115	155.164	153.302	212.63
C16orf46	5.073	4.433	1.03	0.641
ENKD1	4.632	9.27	0.824	0.641
C16orf5	18.529	18.539	1.854	3.207
C16orf52	74.557	35.869	30.908	63.821
PAGR1	48.308	40.705	32.35	20.205
C16orf54	0	0	0	0
C16orf55	23.823	30.63	14.424	20.205
USB1	28.455	15.315	17.308	14.432
C16orf58	31.985	12.091	16.484	13.149
C16orf59	10.367	3.224	2.679	1.924
CMC2	391.316	271.638	349.874	319.747
C16orf62	204.04	205.945	14.424	19.243
VPS9D1	2.647	2.015	2.061	2.245
C16orf70	22.279	27.406	44.713	62.218
C16orf71	0	0	0	0
C16orf72	68.602	146.298	89.22	110.966
MEIOB	0	0	0	0
C16orf74	1.765	1.612	4.327	5.452
C16orf78	0	0	0	0
BRICD5	1.985	2.015	1.648	1.924
C16orf80	5.956	3.627	11.127	16.677
C16orf82	0	0	0.206	0
C16orf86	0.221	0	0.206	0.321
C16orf87	8.823	24.987	27.199	24.695
C16orf88	12.353	8.463	2.473	1.924
C16orf89	0	0	0	0
C16orf90	0	0	0	0
C16orf91	0	0	0	0
C16orf92	0	0	0.206	0
C16orf93	1.765	1.612	0.618	0
C16orf95	1.544	0.806	0.206	0
C16orf96	0	0	0	0
C17orf100	9.926	14.106	7.006	4.169
OGFOD3	107.204	116.877	35.647	56.766
C17orf102	0	0	0	0
C17orf103	1.765	3.224	4.121	1.283
C17orf104	0	0	0	0
C17orf105	0	0	0	0
C17orf107	1.103	2.418	0.412	0.641
LYRM9	0.882	2.418	4.327	13.791
SMIM5	0.221	0	1.03	0.641
SMIM6	0	0	0	0
HID1	7.279	3.224	2.473	2.886
GID4	1.324	2.418	8.242	10.904
SPATA32	0	0	0	0.321
C17orf47	0	0	0	0
ADPRM	2.868	0.403	7.418	7.376
C17orf49	160.585	121.31	116.419	133.736
C17orf50	0	0	0	0
C17orf51	3.309	0.403	4.533	2.886
C17orf53	10.588	4.836	4.121	7.056
ENTHD2	16.544	7.254	5.769	5.131
EFCAB13	0	0	0	0.641
C17orf58	31.102	30.63	15.66	10.583
C17orf59	5.073	4.836	4.121	0.641
C17orf61	30.882	51.184	116.007	90.119
C17orf62	62.646	26.197	12.363	4.811
FAM222B	38.161	35.063	24.108	22.129
C17orf64	0	0	0	0
C17orf66	0	0	0	0
C17orf67	9.265	1.209	2.267	3.849
CRHR1-IT1	1.103	0	0.618	0
C17orf70	139.85	115.668	12.363	7.056
C17orf72	0.221	0	0.206	0
C17orf74	0	0	0.412	0
C17orf75	23.161	26.197	19.987	10.904
C17orf77	0	0	0	0
C17orf78	0	0	0.206	0
C17orf79	143.159	168.061	47.392	29.826
C17orf80	12.132	16.524	10.303	9.942
ELP5	16.103	15.315	38.532	69.594
C17orf82	0.221	0.806	0	0
C17orf85	65.293	117.683	103.644	140.471
C17orf89	86.69	67.305	86.129	69.273
OXLD1	8.603	20.151	1.03	0.641
C17orf96	3.971	4.03	14.218	10.263
C17orf97	1.103	1.612	4.327	2.566
C17orf98	0	0	0.206	0
C17orf99	0	0.403	0	0
LDLRAD4	0	0	0	0
C18orf21	7.72	18.539	15.042	19.243
C18orf25	4.853	6.045	11.333	10.904
DYNAP	0	0	0	0
C18orf32	12.794	7.254	6.388	8.98
CCDC178	0	0	0	0
C18orf42	0	0.403	0.206	0
C18orf54	1.103	0.403	0.618	0.641
C18orf56	6.838	8.867	20.605	21.488
C18orf62	0	0	0	0
C18orf63	0	0	0	0
C18orf8	16.323	6.448	6.8	8.018
C19orf10	47.867	19.345	17.102	11.225
C19orf12	3.529	2.015	0.618	1.283
C19orf18	0	0	0.206	0
C19orf21	6.176	4.433	1.442	2.245
C19orf24	134.777	133.401	43.683	52.276
C19orf25	5.735	4.433	0.618	1.283
C19orf26	4.191	3.627	1.854	1.604
CACTIN	21.617	19.345	16.69	21.488
C19orf33	50.734	31.033	28.641	24.695
C19orf35	0	0	0	0
C19orf38	0.662	0.403	1.442	0.641
C19orf40	2.868	0.806	0.412	0.641
SMIM7	173.159	203.93	92.929	83.384
C19orf43	351.832	361.512	309.694	227.062
C19orf44	5.294	7.254	4.739	4.169
C19orf45	0	0.403	0	0
SYNE4	0	0	0	0.321
C19orf48	0	0	0	0
DNAAF3	7.059	10.882	0.618	3.207
C19orf53	221.687	181.764	203.99	197.557
C19orf54	1.103	1.209	2.061	3.528
C19orf55	8.162	10.479	2.679	3.207
C19orf57	3.088	0	0.412	0
C19orf59	0	0	0	0
C19orf6	224.996	184.988	121.776	93.006
C19orf60	4.412	4.433	1.236	1.924
EMC10	37.279	6.448	1.03	0.321
C19orf66	5.735	15.315	8.242	11.866
C19orf69	0	0	0	0
C19orf70	0.662	0	0.824	1.283
C19orf71	0	0.403	0.206	0
C19orf73	2.426	1.612	1.854	1.924
SIGLECL1	0	0	0	0
ADM5	0	0	0.824	0
C19orf77	0.221	0.403	0	0
PET100	25.367	11.285	4.327	8.98
C19orf80	0.441	1.209	0.412	0.641
C19orf81	0	0	0	0
C1D	10.809	15.315	13.805	24.053
C1GALT1	20.956	34.66	12.775	21.808
C1GALT1C1	76.322	111.638	87.572	70.556
C1orf100	0	0	0	0
C1orf101	0	0	0.412	1.604
C1orf105	0	0	0	0
C1orf106	0.662	1.612	0.412	0
C1orf109	23.603	18.136	11.333	14.432
C1orf110	0	0	47.804	61.897
C1orf111	0	0	0	0
C1orf112	11.25	7.657	18.545	26.298
C1orf114	0	0	0.206	0
C1orf115	2.206	2.418	3.091	0
C1orf116	0	0	0	0
C1orf122	11.691	10.479	0.206	0
C1orf123	204.04	120.101	75.827	85.629
SPRTN	7.5	16.121	28.641	28.864
C1orf126	1.324	0.403	0	0.321
C1orf127	0	0	0	0
C1orf129	0	0	0	0
NCMAP	1.103	0	0	0
C1orf131	4.412	8.867	19.781	22.129
SERTAD4-AS1	0.221	0	0	0
AUNIP	12.794	9.27	24.932	22.129
C1orf140	0	0	0	0
C1orf141	0	0	0	0
SZRD1	319.185	387.306	341.838	484.913
C1orf146	0	0.403	0	0
GCSAML	0	0	0	0
C1orf158	0	0	0	0
C1orf159	10.809	14.509	6.8	6.735
C1orf162	0	0.403	0.206	0
C1orf168	0	0.403	0	0
C1orf170	0	0.403	0	0
C1orf172	1.985	0.806	0	0
C1orf173	0	0	0	0
C1orf174	73.896	89.068	87.984	106.796
C1orf177	0	0	0	0
TSACC	0.221	2.015	1.648	2.886
C1orf185	0.221	0	0	0
C1orf186	0	0	0	0
DRAXIN	0.441	0	0	0
C1orf189	0	0	0.412	0
LURAP1	11.912	10.882	3.091	3.528
C1orf192	0.441	0	0.412	0
C1orf194	0	0	0	0
C1orf198	23.382	68.111	44.507	52.917
C1orf200	0	0	0	0
STPG1	17.426	22.972	4.739	5.773
C1orf21	0	0	1.03	1.283
C1orf210	0	0	0	0
C1orf220	0.221	0	0	0
C1orf226	48.97	55.617	25.55	27.26
C1orf227	0	0	0	0
C1orf228	0	0.806	1.854	2.566
C1orf229	0.662	1.209	0	0
C1orf27	0.221	2.418	3.297	8.98
COA6	0.441	2.418	1.854	1.283
C1orf35	34.191	35.063	36.677	25.336
THEMIS2	0.662	2.015	2.885	5.773
[truncated: 18,813 more rows]
